# Supplementary material for: First Outpatient Follow-Up After Psychiatric Hospitalization: Does One Size Fit All?
Source: Atypon-hosted journal article supplement (doi:10.1176/appi.ps.201400081), 2014-12-17
Supplement: appi.ps.201400081.ds001.pdf [file appi.ps.201400081.ds001.pdf]

 


Psychiatry Online
