# Supplementary material for: First Outpatient Follow-Up After Psychiatric Hospitalization: Does One Size Fit All?
Source: Atypon-hosted journal article supplement (doi:10.1176/appi.ps.201400081), 2014-12-17
Supplement: appi.ps.201400081.ds001.pdf [file appi.ps.201400081.ds001.pdf]

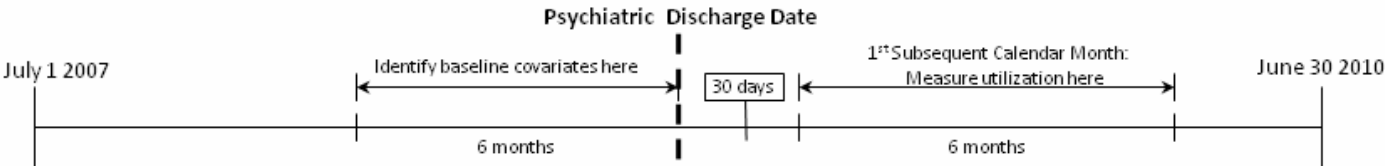

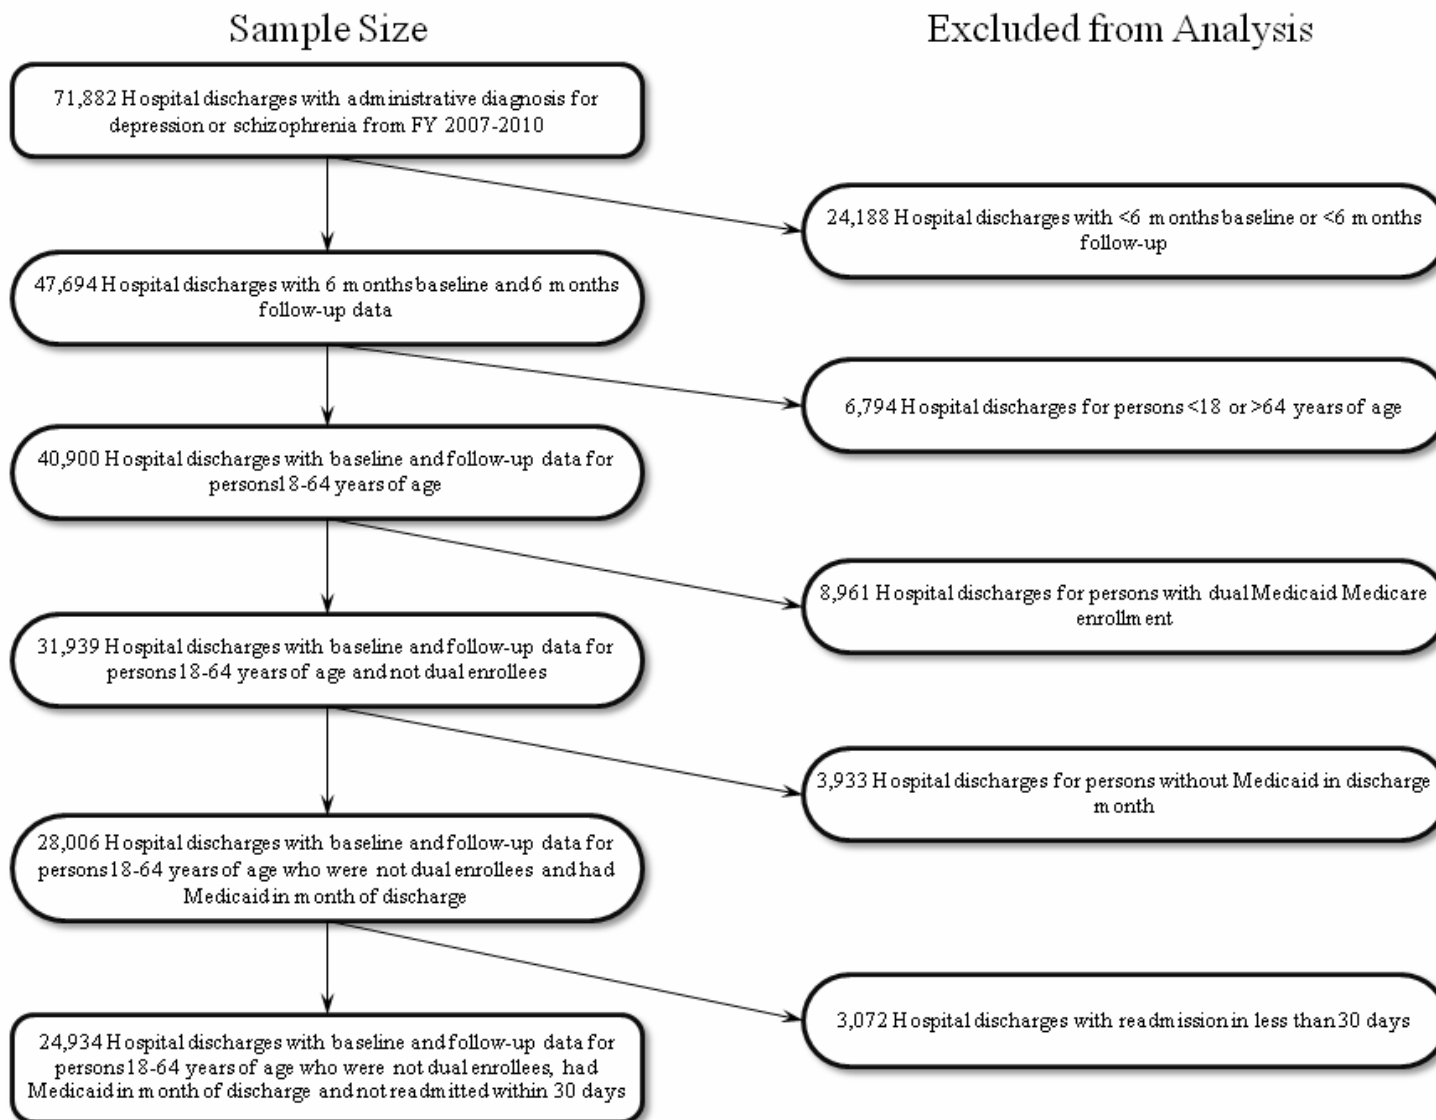

Supplemental Data Table A. Health Care utilization by condition, medical home status, and time of first Mental Health follow-up visit after inpatient stay

| FIRST DISCHARGE ONLY     |                                               | Depression    |                |                |                  |                |                |
|--------------------------|-----------------------------------------------|---------------|----------------|----------------|------------------|----------------|----------------|
|                          |                                               | Medical Home  |                |                | Non-Medical-Home |                |                |
|                          |                                               | 7,219         |                |                | 7,577            |                |                |
| Sample size (discharges) | Dependent Variable                            | 0-7d vs. >30d | 8-30d vs. >30d | 0-7d vs. 8-30d | 0-7d vs. >30d    | 8-30d vs. >30d | 0-7d vs. 8-30d |
|                          | Any claim for antidepressant                  | 13.9%**       | 12.6%**        | 1.3%           | 18.1%**          | 12.7%**        | 5.4%*          |
|                          | Percent days covered if claim                 | 1.0%          | 1.7%           | -.7%           | 3.8%             | 1.1%           | 2.7%           |
|                          | Number of mental health visits                | 2.16**        | 2.50**         | -.34           | 3.23**           | 2.23**         | 1.00*          |
|                          | Total number of outpatient visits             | 1.33*         | 2.34**         | -1.01          | 3.89**           | 2.67**         | 1.22           |
|                          | Number of Family/Group Psychotherapy Sessions | .12**         | .11**          | -.01           | .04              | -.01           | .05            |
|                          | Number of Individual Psychotherapy Sessions   | 1.05**        | 1.12**         | -.07           | 1.12**           | .78**          | .34            |
|                          | Number of ED visits                           | .07           | .12            | -.05           | .28              | -.07           | .35            |
|                          | Number of admissions                          | -.03          | -.05           | .02            | -.05             | -.10           | .05            |
|                          | Number of depression admissions               | .04           | .02            | .02            | -.01             | .01            | .02            |
|                          | Total hospital days                           | -3.10*        | -2.89          | -.21           | -2.41            | -.74           | -1.67          |
|                          | Total depression hospital days                | -.51          | -.64           | .13            | -.38             | -1.04          | .65            |

  

|                          |                                                | Schizophrenia |                |                |                 |                |                |
|--------------------------|------------------------------------------------|---------------|----------------|----------------|-----------------|----------------|----------------|
|                          |                                                | Medical Home  |                |                | No-Medical-Home |                |                |
|                          |                                                | 2,473         |                |                | 2,490           |                |                |
| Sample size (discharges) | Dependent Variable                             | 0-7d vs. >30d | 8-30d vs. >30d | 0-7d vs. 8-30d | 0-7d vs. >30d   | 8-30d vs. >30d | 0-7d vs. 8-30d |
|                          | Any claim for antipsychotic                    | 6.5%**        | 5.3%**         | 1.2%           | 9.2%**          | 11.4%**        | -2.2%          |
|                          | Percent days covered if claim                  | 1.4%          | 2.8%           | -1.4%          | 6.7%**          | 5.1%**         | 1.6%           |
|                          | Number of mental health visits                 | 3.06**        | 2.34**         | .72            | 2.89**          | 2.59**         | .30            |
|                          | Total number of outpatient visits              | 3.08**        | 3.69           | -.61           | 2.83**          | 3.10           | -.27           |
|                          | Any Assertive Community Treatment              | -6.2%*        | -5.6%          | -.6%           | -9.1%**         | -7.4%**        | -1.7%          |
|                          | Months receiving Assertive Community Treatment | -.25          | -.37**         | .12            | -.39**          | -.32**         | -.07           |
|                          | Number of Family/Group Psychotherapy Sessions  | .04           | .14            | -.10           | .09*            | .17**          | -.08           |
|                          | Number of ED visits                            | .08           | .04            | .04            | .17             | -.29*          | .46*           |
|                          | Number of admissions                           | .01           | -.01           | .02            | -.20**          | -.14**         | -.06           |
|                          | Number of schizophrenia admissions             | -.01          | -.05           | .04            | -.13**          | -.10*          | -.03           |
|                          | Total hospital days                            | .89           | 4.95           | -4.05          | 1.23            | -2.16          | 3.39           |
|                          | Total schizophrenia hospital days              | .05           | 4.87           | 4.37           | 3.56            | 2.25           | 1.31           |

\*p<.05 \*\*p<.01 †All measures are utilization during subsequent 6 months. PDC=Proportion of Days Covered; ED=Emergency Department Example Interpretation: First outpatient with a mental health specialist within 0-7 days vs. >30 days is associated with an 13.9 percentage point increase in the probability of having any claim for an

antidepressant during 6-month follow-up among persons discharged with a depression diagnosis in a medical home.

Supplemental Data Table B. Health Care utilization by condition, medical home status, and time of first outpatient follow-up visit after inpatient stay

| FIRST DISCHARGE ONLY                          | Depression    |                |                |                  |                |                |
|-----------------------------------------------|---------------|----------------|----------------|------------------|----------------|----------------|
|                                               | Medical Home  |                |                | Non-Medical-Home |                |                |
|                                               | 7,219         |                |                | 7,577            |                |                |
| Sample size (discharges)                      | 0-7d vs. >30d | 8-30d vs. >30d | 0-7d vs. 8-30d | 0-7d vs. >30d    | 8-30d vs. >30d | 0-7d vs. 8-30d |
| Dependent Variable                            |               |                |                |                  |                |                |
| Any claim for antidepressant                  | 9.5%**        | 6.4%**         | 3.1%**         | 10.8%**          | 8.5%**         | 2.3%           |
| Percent days covered if claim                 | 4.2%**        | 4.7%**         | -.5%           | 4.9%**           | 4.4%**         | .5%            |
| Number of mental health visits                | 1.37**        | 1.10**         | .26*           | 1.42**           | .80**          | .62**          |
| Total number of outpatient visits             | 4.08**        | 3.42**         | .66**          | 4.51**           | 3.10**         | 1.41**         |
| Number of Family/Group Psychotherapy Sessions | .10**         | .08**          | .02            | .02              | -.02           | .04            |
| Number of Individual Psychotherapy Sessions   | .76**         | .61**          | .16            | .67**            | .37**          | .30**          |
| Number of ED visits                           | .30**         | .14            | .16            | .27*             | .25            | .03            |
| Number of admissions                          | .16**         | .09*           | .07            | .03              | -.04           | .07            |
| Number of depression admissions               | .09**         | .04*           | .05*           | -.03             | -.09**         | .06**          |
| Total hospital days                           | -1.08         | -1.09          | .01            | -2.50**          | -2.07*         | -.43           |
| Total depression hospital days                | .35           | -.36           | .71            | -2.80**          | -3.04**        | .24            |

  

|                                                | Schizophrenia |                |                |                 |                |                |
|------------------------------------------------|---------------|----------------|----------------|-----------------|----------------|----------------|
|                                                | Medical Home  |                |                | No-Medical-Home |                |                |
|                                                | 2,473         |                |                | 2,490           |                |                |
| Sample size (discharges)                       | 0-7d vs. >30d | 8-30d vs. >30d | 0-7d vs. 8-30d | 0-7d vs. >30d   | 8-30d vs. >30d | 0-7d vs. 8-30d |
| Dependent Variable                             |               |                |                |                 |                |                |
| Any claim for antipsychotic                    | 7.5%**        | 7.8%**         | -.3%           | 17.7%**         | 16.8%**        | .9%            |
| Percent days covered if claim                  | 8.5%**        | 7.6%**         | .9%            | 9.1%**          | 8.4%**         | .7%            |
| Number of mental health visits                 | 2.43**        | 1.34**         | 1.09**         | 2.34**          | 2.04**         | .30            |
| Total number of outpatient visits              | 8.96**        | 6.56**         | 2.40**         | 5.80**          | 4.75**         | 1.05           |
| Any Assertive Community Treatment              | 7.7%**        | 5.4%**         | 2.3%           | 1.9%            | .1%            | 1.8%           |
| Months receiving Assertive Community Treatment | .49**         | .35**          | .14            | .20**           | .13            | .07            |
| Number of Family/Group Psychotherapy Sessions  | -.00          | -.04           | -.04           | .12**           | .14**          | .02            |
| Number of ED visits                            | .39**         | .45*           | -.06           | .20             | .19            | .01            |
| Number of admissions                           | .03           | -.01           | .04            | .01             | .00            | .01            |
| Number of schizophrenia admissions             | -0.04         | -.09*          | .05            | .04             | .02            | .02            |
| Total hospital days                            | -3.73         | -1.54          | -2.19          | -.40            | -.71           | .31            |
| Total schizophrenia hospital days              | -5.33         | -1.11          | -4.22          | -2.33           | -1.27          | -1.06          |

\*p<.05 \*\*p<.01 †All measures are utilization during subsequent 6 months. PDC=Proportion of Days Covered; ED=Emergency Department Example Interpretation: First outpatient visit (any provider) within 0-7 days vs. >30 days is associated with a 9.5 percentage point increase in the probability of having any claim for an antidepressant during 6-month follow-up among persons discharged with a depression diagnosis in a medical home.

Supplemental Data Table C. Number of Observed Hospital Discharges by Unique Individuals

|                                                              | Depression          |                     |                        |                     |                     |                        | Schizophrenia       |                     |                        |                     |                     |                        |
|--------------------------------------------------------------|---------------------|---------------------|------------------------|---------------------|---------------------|------------------------|---------------------|---------------------|------------------------|---------------------|---------------------|------------------------|
|                                                              | Medical Home        |                     |                        | No Medical Home     |                     |                        | Medical Home        |                     |                        | No Medical Home     |                     |                        |
| Number of Observed Discharges                                | NT=8,821<br>N=7,147 | % of Unique Persons | % of Unique Discharges | NT=9,047<br>N=7,577 | % of Unique Persons | % of Unique Discharges | NT=3,572<br>N=2,473 | % of Unique Persons | % of Unique Discharges | NT=3,494<br>N=2,490 | % of Unique Persons | % of Unique Discharges |
| 1                                                            | 5,972               | 84%                 | 68%                    | 6,451               | 85%                 | 71%                    | 1,777               | 72%                 | 50%                    | 1,844               | 74%                 | 53%                    |
| 2                                                            | 826                 | 12%                 | 19%                    | 897                 | 12%                 | 20%                    | 444                 | 18%                 | 25%                    | 416                 | 17%                 | 24%                    |
| 3                                                            | 246                 | 3%                  | 8%                     | 159                 | 2%                  | 5%                     | 151                 | 6%                  | 13%                    | 147                 | 6%                  | 13%                    |
| 4                                                            | 72                  | 1%                  | 3%                     | 44                  | 1%                  | 2%                     | 71                  | 3%                  | 8%                     | 52                  | 2%                  | 6%                     |
| 5                                                            | 22                  | 0%                  | 1%                     | 13                  | 0%                  | 1%                     | 17                  | 1%                  | 2%                     | 21                  | 1%                  | 3%                     |
| 6                                                            | 5                   | 0%                  | 0%                     | 9                   | 0%                  | 1%                     | 8                   | 0%                  | 1%                     | 7                   | 0%                  | 1%                     |
| 7                                                            | 2                   | 0%                  | 0%                     | 3                   | 0%                  | 0%                     | 3                   | 0%                  | 1%                     | 2                   | 0%                  | 0%                     |
| 8                                                            | 1                   | 0%                  | 0%                     | 0                   | 0%                  | 0%                     | 2                   | 0%                  | 0%                     | 1                   | 0%                  | 0%                     |
| 9                                                            | 1                   | 0%                  | 0%                     | 1                   | 0%                  | 0%                     | 0                   | 0%                  | 0%                     | 0                   | 0%                  | 0%                     |
| First Outpatient Follow-up Visit Distribution (Any Provider) |                     |                     |                        |                     |                     |                        |                     |                     |                        |                     |                     |                        |
| 0-7 days                                                     | NT=2,798<br>N=2,542 | N/A                 | 32%                    | NT=2,389<br>N=2,200 | N/A                 | 26%                    | NT=1,356<br>N=1,078 | N/A                 | 38%                    | NT=1,136<br>N=941   | N/A                 | 33%                    |
| 8-30 days                                                    | NT=3,690<br>N=3,267 | N/A                 | 42%                    | NT=3,402<br>N=3,125 | N/A                 | 38%                    | NT=1,362<br>N=1,163 | N/A                 | 38%                    | NT=1,229<br>N=1,051 | N/A                 | 35%                    |
| >30 days                                                     | NT=2,333<br>N=2,157 | N/A                 | 26%                    | NT=3,256<br>N=2,994 | N/A                 | 36%                    | NT=854<br>N=730     | N/A                 | 24%                    | NT=1,129<br>N=956   | N/A                 | 32%                    |

Notes: NT=total discharges and N=unique individuals. N in outpatient follow-up does not sum to total N because multiple admissions could lead to the same individual appearing in each category of follow-up.

Supplemental Data Table D. Unique individual characteristics among adults discharged with depression by follow-up time and medical home status

| Characteristic                                   | Depression Medical Home        |                                 |                       |                        |       | Depression Non-Medical Home |                                 |                       |                        |       |  |
|--------------------------------------------------|--------------------------------|---------------------------------|-----------------------|------------------------|-------|-----------------------------|---------------------------------|-----------------------|------------------------|-------|--|
|                                                  | Overall<br>(N=7,147)           | None in 30<br>days<br>(N=1,928) | 0-7 days<br>(N=2,262) | 8-30 days<br>(N=2,957) |       | Overall<br>(N=7,577)        | None in 30<br>days<br>(N=2,771) | 0-7 days<br>(N=1,958) | 8-30 days<br>(N=2,848) |       |  |
|                                                  | Mean (Standard Deviation) or % |                                 |                       |                        |       | p                           | Mean (Standard Deviation) or %  |                       |                        |       |  |
| Age (years)                                      | 42.5±12.2                      | 41.0±12.6                       | 42.1±12.0             | 43.7±11.9              | <.001 | 42.3±12.4                   | 41.4±12.7                       | 42.6±12.1             | 43.1±12.2              | <.001 |  |
| Male                                             | 22.9                           | 23.1                            | 22.2                  | 23.4                   | .56   | 29.7                        | 32.4                            | 27.4                  | 28.7                   | <.001 |  |
| White                                            | 61.3                           | 57.7                            | 63.1                  | 62.2                   | <.001 | 67.6                        | 65.6                            | 69.2                  | 68.5                   | .02   |  |
| Black                                            | 32.2                           | 36.7                            | 30.7                  | 30.5                   | <.001 | 27.4                        | 29.2                            | 25.7                  | 26.8                   | .02   |  |
| Asian                                            | .3                             | 0.3                             | 0.4                   | 0.4                    | .72   | 0.3                         | 0.3                             | 0.4                   | 0.3                    | .77   |  |
| American Indian                                  | 2.4                            | 2.2                             | 2                     | 2.8                    | .11   | 1.6                         | 1.4                             | 2.1                   | 1.4                    | .12   |  |
| Hispanic                                         | 1.8                            | 1.8                             | 1.8                   | 1.9                    | .99   | 1.9                         | 2.2                             | 1.9                   | 1.5                    | .16   |  |
| Hospital length of stay (current) †              | 4.6±5.4                        | 4.5±4.3                         | 4.7±6.0               | 4.6±5.)                | .7    | 5.5±10.0                    | 5.9±13.8                        | 5.2 (7.3)             | 5.4±6.4                | .04   |  |
| Number of state hospital Admits                  | .0±.1                          | .0±.1                           | .0±.1                 | .0±.1                  | .89   | .0±.2                       | .0±.2                           | 0.1 (0.2)             | .0±.2                  | .02   |  |
| Number of months in medical home                 | 4.6±2.0                        | 4.6±2.0                         | 4.6±2.0               | 4.7±2.0                | .05   | .5±1.4                      | .5±1.3                          | 0.5 (1.4)             | .5±1.4                 | .1    |  |
| Chronic Illness & Disability Payment Score       | 5.1±2.5                        | 4.6±2.5                         | 5.4±2.6               | 5.2±2.5                | <.001 | 3.8±2.9                     | 3.1±2.8                         | 4.4 (2.9)             | 4.1±2.9                | <.001 |  |
| Number of months enrolled in Medicaid            | 5.8±.8                         | 5.8±.8                          | 5.7±.8                | 5.8±.8                 | .44   | 4.5±2.2                     | 4.1±2.4                         | 4.7 (2.0)             | 4.6±2.1                | <.001 |  |
| Enrolled in Behavioral Health Managed Care Pilot | 8.4                            | 9.5                             | 8                     | 7.9                    | .1    | 3.2                         | 3                               | 3.2                   | 3.4                    | .63   |  |
| Number of specified medical conditions           | 3.5±2.1                        | 3.4±2.3                         | 3.6±2.1               | 3.5±2.1                | .006  | 3.7±2.5                     | 3.6±2.6                         | 3.8 (2.4)             | 3.7±2.4                | .006  |  |
| Number of specified psychiatric conditions       | 1.6±.6                         | 1.5±.7                          | 1.6±.6                | 1.6±.6                 | <.001 | 1.5±.8                      | 1.4±.8                          | 1.5 (0.7)             | 1.5±.8                 | <.001 |  |
| Specified Medical Conditions with medication     | 1.0±1.1                        | .9±1.1                          | 1.0±1.1               | 1.0±1.1                | <.001 | .8±1.1                      | .6±1.0                          | 0.9 (1.1)             | .8±1.1                 | <.001 |  |
| Specified Psychiatric Conditions with medication | .4±.5                          | .3±.5                           | .5±.5                 | .4±.5                  | <.001 | .3±.5                       | .2±.4                           | 0.4 (0.5)             | .3±.5                  | <.001 |  |
| Number of individual psychotherapy sessions      | .8±3.0                         | 0.3±1.3                         | 1.3±4.3               | .8±2.5                 | <.001 | .5±2.3                      | .2±1.1                          | 1.0 (3.4)             | .6±2.2                 | <.001 |  |
| Number of family/group psychotherapy sessions    | .1±.8                          | .0±.7                           | .1±1.0                | .1±.8                  | .009  | .1±0.9                      | .0±.4                           | 0.1 (1.0)             | .1±1.1                 | .003  |  |
| Number of months with ACT visit                  | .0±.4                          | .0±.1                           | .1±.5                 | .0±.4                  | <.001 | .0±.3                       | .0±.1                           | 0.0 (0.5)             | .0±.3                  | <.001 |  |
| Total number of outpatient visits                | 9.0±8.7                        | 6.4±6.0                         | 10.8±11.2             | 9.3±7.7                | <.001 | 5.9±7.5                     | 3.7±5.2                         | 8.5 (10.1)            | 6.3±6.6                | <.001 |  |
| Number of medical home visits                    | 2.1±2.6                        | 1.6±2.3                         | 2.4±2.7               | 2.3±2.6                | <.001 | .2±.9                       | .2±.9                           | 0.2 (1.0)             | .2±.8                  | .15   |  |
| Number of mental health visits                   | 1.8±4.5                        | .9±2.3                          | 2.6±6.1               | 1.8±3.8                | <.001 | 1.2±3.6                     | .6±2.2                          | 2.1 (5.0)             | 1.3±3.5                | <.001 |  |
| Number of Emergency Department visits            | 2.0±3.3                        | 2.0±3.1                         | 2.1±3.3               | 2.0±3.5                | .29   | 1.6±3.2                     | 1.3±3.0                         | 1.9 (3.7)             | 1.7±3.1                | <.001 |  |
| Total hospital days                              | 3.6±9.7                        | 4.0±10.7                        | 3.3±9.0               | 3.5±9.6                | .04   | 3.6±10.2                    | 3.3±9.8                         | 3.9 (10.5)            | 3.8±10.3               | .05   |  |
| Total depression/schizophrenia hospital days     | 1.1±5.0                        | 1.1±5.1                         | 1.1±5.6               | 1.0±4.6                | .47   | 1.0±5.0                     | .8±4.4                          | 1.2 (5.7)             | 1.1±5.0                | .06   |  |
| Total Admissions                                 | .6±1.2                         | .6±1.4                          | .6±1.2                | .6±1.1                 | .03   | .5±1.1                      | .5±1.0                          | 0.6 (1.1)             | .5±1.1                 | .008  |  |
| Total depression/schizophrenia admissions        | .2±.6                          | .2±.7                           | .2±.6                 | .2±.6                  | .96   | .1±.5                       | .1±.5                           | 0.2 (0.5)             | .1±.5                  | .05   |  |
| Not living in community independently            | 2.5                            | 3.4                             | 2                     | 2.2                    | .007  | 5.5                         | 6.8                             | 4                     | 5.3                    | <.001 |  |

† = All utilization covariates except current length of stay are utilization during previous 6 months. N=total unique individuals. Mean (SD) are unadjusted person-discharge characteristics within each cohort. P-values by ANOVA for continuous variables and chi2 test for binary / categorical variables

Supplemental Data Table E. Unique individual characteristics among adults discharged with schizophrenia by follow-up time and medical home status

| Characteristic                                   | Schizophrenia Medical Home     |                               |                     |                      |       | Schizophrenia Non-Medical Home |                               |                     |                      |       |
|--------------------------------------------------|--------------------------------|-------------------------------|---------------------|----------------------|-------|--------------------------------|-------------------------------|---------------------|----------------------|-------|
|                                                  | Overall<br>(N=2,473)           | None in<br>30 days<br>(N=586) | 0-7 days<br>(N=909) | 8-30 days<br>(N=978) | p     | Overall<br>(N=2,490)           | None in 30<br>days<br>(N=833) | 0-7 days<br>(N=770) | 8-30 days<br>(N=887) | P     |
|                                                  | Mean (Standard Deviation) or % |                               |                     |                      |       | Mean (Standard Deviation) or % |                               |                     |                      |       |
| Age (years)                                      | 40.5±12.7                      | 40.4±13.2                     | 40.2±12.4           | 40.7±12.8            | .73   | 38.9±13.2                      | 39.3±13.1                     | 38.3±13.0           | 39.1±13.3            | .27   |
| Male                                             | 44.8                           | 49.7                          | 43.3                | 43.1                 | .02   | 50.2                           | 52.3                          | 48.6                | 49.7                 | .3    |
| White                                            | 37.8                           | 29                            | 42.6                | 38.5                 | <.001 | 41.4                           | 36.9                          | 43.8                | 43.7                 | .004  |
| Black                                            | 57                             | 64.3                          | 53.4                | 56                   | <.001 | 53.8                           | 58.2                          | 51.6                | 51.5                 | .007  |
| Asian                                            | .6                             | 1                             | 0.6                 | 0.4                  | .31   | 0.5                            | 0.6                           | 0.6                 | 0.3                  | .63   |
| American Indian                                  | 2                              | 2.6                           | 1.7                 | 2                    | .47   | 2                              | 2                             | 1.7                 | 2.1                  | .79   |
| Hispanic                                         | 1.7                            | 1.7                           | 1.7                 | 1.7                  | .99   | 1.4                            | 1.9                           | 1.2                 | 1.2                  | .37   |
| Hospital length of stay (current) †              | 11.4±25.7                      | 14.2±38.4                     | 10.8±21.3           | 10.4±19.0            | .01   | 15.0±35.3                      | 16.5 (42.6)                   | 14.4±29.5           | 14.1±32.1            | .31   |
| Number of state hospital Admits                  | .1±.4                          | .2±.4                         | .2±.4               | .1±.3                | .005  | .2±.4                          | 0.3 (0.4)                     | .2±.5               | .2±.4                | <.001 |
| Number of months in medical home                 | 4.9±1.9                        | 4.8±2.0                       | 5.0±1.9             | 5.0±1.8              | .24   | .5±1.3                         | 0.4 (1.3)                     | .5±1.4              | .5±1.4               | .61   |
| Chronic Illness & Disability Payment Score       | 4.2±2.6                        | 3.7±2.5                       | 4.4±2.6             | 4.3±2.5              | <.001 | 3.4±2.8                        | 2.9 (2.7)                     | 3.6±2.8             | 3.6± 2.8             | <.001 |
| Number of months enrolled in Medicaid            | 5.9±.6                         | 5.8±.7                        | 5.9±.5              | 5.9±.6               | .09   | 4.7±2.1                        | 4.5 (2.2)                     | 4.9±2.0             | 4.8±2.0              | <.001 |
| Enrolled in Behavioral Health Managed Care Pilot | 4.9                            | 5.1                           | 5.6                 | 4.2                  | .35   | 2.1                            | 1.8                           | 3                   | 1.6                  | .11   |
| Number of specified medical conditions           | 2.6±2.1                        | 2.4±2.2                       | 2.6±2.1             | 2.5±2.1              | .22   | 3.2±2.4                        | 3.3 (2.5)                     | 3.2±2.4             | 3.1±2.4              | .18   |
| Number of specified psychiatric conditions       | 1.6±.6                         | 1.4±.7                        | 1.6±.6              | 1.6±.6               | <.001 | 1.5±.7                         | 1.5 (0.8)                     | 1.5±.7              | 1.5±.7               | .09   |
| Specified Medical Conditions with medication     | .8±1.1                         | .7±1.0                        | .9±1.2              | .8±1.1               | <.001 | .6±1.0                         | 0.5 (0.9)                     | .7±1.1              | .7±1.1               | <.001 |
| Specified Psychiatric Conditions with medication | .8±.6                          | .7±.6                         | 1.0±.6              | .8±.6                | <.001 | .7±.6                          | 0.6 (0.6)                     | .8±.6               | .7±.6                | <.001 |
| Number of individual psychotherapy sessions      | 1.3±3.6                        | .5±1.7                        | 2.0±4.9             | 1.2±2.8              | <.001 | 1.1±3.4                        | 0.5 (2.1)                     | 1.7±4.5             | 1.1±3.0              | <.001 |
| Number of family/group psychotherapy sessions    | .2±1.3                         | .1±.8                         | .3±1.5              | .2±1.3               | .01   | .1±.9                          | 0.0 (0.3)                     | .2±1.4              | .1±.7                | .009  |
| Number of months with ACT visit                  | .4±1.4                         | .1±.8                         | .7±1.8              | .3±1.2               | <.001 | .3±1.2                         | 0.1 (0.6)                     | .6±1.7              | .3±1.1               | <.001 |
| Total number of outpatient visits                | 11.5±16.3                      | 6.1±10.1                      | 16.4±21.0           | 10.3±12.7            | <.001 | 7.9±13.4                       | 4.0 (7.3)                     | 12.4±18.5           | 7.7±11.3             | <.001 |
| Number of medical home visits                    | 1.3±2.0                        | .8±1.6                        | 1.6±2.2             | 1.4±2.0              | <.001 | .1±.5                          | 0.0 (0.3)                     | .1±.4               | .1±.7                | .02   |
| Number of mental health visits                   | 3.2±5.3                        | 1.8±3.3                       | 4.4±6.7             | 3.0±4.5              | <.001 | 2.4±4.6                        | 1.3 (3.2)                     | 3.5±5.7             | 2.6±4.4              | <.001 |
| Number of Emergency Department visits            | 1.8±2.9                        | 1.7±2.6                       | 1.8±3.0             | 1.8±2.9              | .6    | 1.4±2.8                        | 1.3 (2.3)                     | 1.6±3.0             | 1.5±3.0              | .15   |
| Total hospital days                              | 5.3±13.4                       | 5.1±12.6                      | 5.8±15.2            | 5.0±12.2             | .41   | 7.3±19.8                       | 7.5 (21.5)                    | 6.3±17.0            | 8.0±20.5             | .22   |
| Total depression/schizophrenia hospital days     | 3.7±12.4                       | 3.5±10.7                      | 4.3±14.6            | 3.3±11.1             | .18   | 5.6±19.0                       | 5.8 (20.7)                    | 4.9±15.9            | 6.0±19.8             | .49   |
| Total Admissions                                 | .5±1.0                         | .6±.9                         | .6±1.0              | .5±.9                | .23   | .5±1.0                         | 0.5 (1.0)                     | .5±1.0              | .6±1.0               | .7    |
| Total depression/schizophrenia admissions        | .3±0.7                         | .3±.7                         | .3±.8               | .3±.7                | .27   | .3±.8                          | 0.3 (0.7)                     | .3±.7               | .3±.8                | .73   |
| Not living in community independently            | 18                             | 16.2                          | 20.1                | 17.2                 | .1    | 24.5                           | 22                            | 24.4                | 27.1                 | .05   |

† = All utilization covariates except current length of stay are utilization during previous 6 months. N=total unique individuals. Mean (SD) are unadjusted person-discharge characteristics within each cohort. P-values by ANOVA for continuous variables and chi2 test for binary / categorical variables

Supplemental Data Table F. Weighted person discharge characteristics among adults discharged with depression diagnosis in a medical home by follow-up timing

|                                                  | Depression Medical Home        |                                 |                          |                           |              |        |        |
|--------------------------------------------------|--------------------------------|---------------------------------|--------------------------|---------------------------|--------------|--------|--------|
|                                                  | Overall<br>(N=8,821)           | None in 30 days<br>(Wt.N=2,360) | 0-7 days<br>(Wt.N=2,790) | 8-30 days<br>(Wt.N=3,684) | Pair1        | Pair 2 | Pair 3 |
|                                                  | Mean (Standard Deviation) or % |                                 |                          |                           | Stdized Diff |        |        |
| Age (years)                                      | 42.7±12.1                      | 42.8±12.1                       | 42.6±12.2                | 42.6±12.1                 | 1.7          | 1.5    | .3     |
| Male                                             | 23.4                           | 23.5                            | 23.3                     | 23.3                      | .5           | .5     | 0      |
| White                                            | 60.8                           | 61.1                            | 60.8                     | 60.7                      | 0.4          | .7     | .3     |
| Black                                            | 32.3                           | 31.9                            | 32.4                     | 32.6                      | 1.1          | 1.4    | .3     |
| Asian                                            | 0.4                            | 0.6                             | 0.3                      | 0.3                       | 5.5          | 5.4    | .1     |
| American Indian                                  | 2.5                            | 2.4                             | 2.5                      | 2.5                       | .4           | .7     | .3     |
| Hispanic                                         | 1.8                            | 1.7                             | 1.9                      | 1.9                       | 1.1          | 1.1    | 0      |
| Hospital length of stay (current) †              | 4.8±5.9                        | 4.8±.6                          | 4.7±5.7                  | 4.7±6.4                   | 2.3          | 1.7    | .5     |
| Number of state hospital Admits                  | .0±.1                          | .0±.1                           | .0±.1                    | .0±.1                     | 1.3          | 1.1    | .1     |
| Number of months in medical home                 | 4.8±1.9                        | 4.8±1.8                         | 4.8±1.9                  | 4.8±1.9                   | .7           | .7     | 0      |
| Chronic Illness & Disability Payment Score       | 5.4±2.6                        | 5.4±2.5                         | 5.4±2.7                  | 5.4±2.6                   | 2.1          | 1.2    | 1      |
| Number of months enrolled in Medicaid            | 5.8±.7                         | 5.8±.7                          | 5.8±.8                   | 5.8±.8                    | 1            | .7     | .3     |
| Enrolled in Behavioral Health Managed Care Pilot | 8.6                            | 8.5                             | 8.6                      | 8.6                       | .3           | .3     | 0      |
| Number of specified medical conditions           | 3.5±2.1                        | 3.5±2.1                         | 3.5±2.1                  | 3.5±2.1                   | .6           | 1      | .5     |
| Number of specified psychiatric conditions       | 1.6±.6                         | 1.6±.6                          | 1.6±.6                   | 1.6±.6                    | 1.2          | .8     | .4     |
| Specified Medical Conditions with medication     | 1.1±1.2                        | 1.1±1.2                         | 1.1±1.2                  | 1.1±1.2                   | .4           | 1.2    | 1.5    |
| Specified Psychiatric Conditions with medication | .5±.5                          | .5±.5                           | .5±.5                    | .5±.5                     | 2.3          | .6     | 1.7    |
| Number of individual psychotherapy sessions      | .9±2.9                         | .8±2.4                          | .9±3.0                   | .9±3.2                    | 2            | 3.2    | 1.1    |
| Number of family/group psychotherapy sessions    | .1±.8                          | .1±.7                           | .1±.8                    | .1±.9                     | 1.4          | 1.6    | .3     |
| Number of months with ACT visit                  | .0±.4                          | .0±.4                           | .0±.4                    | .0±.4                     | .8           | .4     | .5     |
| Total number of outpatient visits                | 9.5±8.8                        | 9.3±7.8                         | 9.7±9.8                  | 9.5±8.8                   | 3.8          | 1.5    | 2.3    |
| Number of medical home visits                    | 2.3±2.7                        | 2.3±2.7                         | 2.3±2.7                  | 2.3±2.7                   | 2.2          | 2.1    | .2     |
| Number of mental health visits                   | 1.9±4.6                        | 1.9±3.9                         | 1.9±4.5                  | 2.0±5.1                   | .6           | 1.9    | 1.3    |
| Number of Emergency Department visits            | 2.3±3.8                        | 2.4±3.5                         | 2.3±3.9                  | 2.3±3.9                   | 2.2          | 2.1    | .1     |
| Total hospital days                              | 4.8±10.9                       | 4.7±10.9                        | 4.8±10.9                 | 4.9±10.9                  | .5           | 1      | .5     |
| Total depression/schizophrenia hospital days     | 2.0±6.2                        | 2.0±6.1                         | 2.0±6.3                  | 2.0±6.2                   | .1           | .3     | .4     |
| Total Admissions                                 | .8±1.5                         | .8±1.5                          | .8±1.5                   | .8±1.4                    | 1.4          | 1.8    | .4     |
| Total depression/schizophrenia admissions        | .4±.8                          | .4±.9                           | .4±.8                    | .4±.8                     | .2           | .9     | .7     |
| Not living in community independently            | 2.8                            | 2.8                             | 2.7                      | 2.8                       | .8           | .1     | .6     |

† = All utilization covariates except current length of stay are utilization during previous 6 months. N=total discharges. Mean (SD) are weighted person-discharge characteristics within each cohort. Absolute standardized differences are expressed as percentages



Supplemental Data Table G. Weighted person discharge characteristics among adults discharged with depression diagnosis not in a medical home by follow-up timing

|                                                  | Depression No Medical Home     |                 |              |              | Pair1        | Pair 2 | Pair 3 |
|--------------------------------------------------|--------------------------------|-----------------|--------------|--------------|--------------|--------|--------|
|                                                  | Overall                        | None in 30 days | 0-7 days     | 8-30 days    |              |        |        |
|                                                  | (N=9,047)                      | (Wt.N=3,265)    | (Wt.N=2,388) | (Wt.N=3,397) |              |        |        |
|                                                  | Mean (Standard Deviation) or % |                 |              |              | Stdized Diff |        |        |
| Age (years)                                      | 42.4±12.4                      | 42.5±12.4       | 42.3±12.4    | 42.5±12.4    | 1.4          | .6     | 2      |
| Male                                             | 29.8                           | 29.8            | 29.7         | 29.8         | .3           | .1     | .2     |
| White                                            | 67.3                           | 67              | 67.4         | 67.6         | 1            | 1.4    | .4     |
| Black                                            | 27.8                           | 28              | 27.9         | 27.6         | .1           | .8     | .7     |
| Asian                                            | .3                             | .3              | .3           | .3           | .4           | .9     | .5     |
| American Indian                                  | 1.7                            | 1.9             | 1.5          | 1.6          | 2.8          | 2.3    | .6     |
| Hispanic                                         | 1.8                            | 1.9             | 1.8          | 1.7          | .4           | 1.1    | .7     |
| Hospital length of stay (current) †              | 5.5±8.9                        | 5.5±10.8        | 5.4±8.6      | 5.5±6.7      | .6           | .3     | 1.1    |
| Number of state hospital Admits                  | .0±.2                          | .0±.2           | .0±.2        | .0±.2        | .4           | .5     | 1      |
| Number of months in medical home                 | .5±1.3                         | .5±1.3          | .5±1.3       | .5±1.3       | .7           | .6     | .1     |
| Chronic Illness & Disability Payment Score       | 4.1±3.0                        | 4.2±3.1         | 4.1±3.0      | 4.1±3.0      | 1.4          | 1      | .4     |
| Number of months enrolled in Medicaid            | 4.6±2.1                        | 4.6±2.1         | 4.6±2.1      | 4.7±2.1      | .3           | .5     | .8     |
| Enrolled in Behavioral Health Managed Care Pilot | 3.1                            | 3               | 3.2          | 3.1          | 1.3          | .6     | .7     |
| Number of specified medical conditions           | 3.8±2.4                        | 3.8±2.5         | 3.8±2.4      | 3.8±2.4      | .9           | .6     | .4     |
| Number of specified psychiatric conditions       | 1.5±.8                         | 1.5±.8          | 1.5±.8       | 1.5±.8       | 1            | .1     | 1.1    |
| Specified Medical Conditions with medication     | .9±1.1                         | .9±1.1          | .9±1.2       | .9±1.1       | .7           | .2     | .5     |
| Specified Psychiatric Conditions with medication | .4±.5                          | .4±.5           | .4±.5        | .4±.5        | .6           | .4     | .1     |
| Number of individual psychotherapy sessions      | .6±2.2                         | .6±2.0          | .6±2.4       | .6±2.2       | .9           | 1.1    | .2     |
| Number of family/group psychotherapy sessions    | .1±.9                          | .1±.9           | .1±.7        | .1±1.0       | 1.5          | 1.3    | .1     |
| Number of months with ACT visit                  | .0±.4                          | .0±.4           | .0±.4        | .0±.4        | 1.1          | 1.1    | .1     |
| Total number of outpatient visits                | 6.3±7.4                        | 6.1±7.0         | 6.6±8.5      | 6.2±6.9      | 5.8          | 1.7    | 4.3    |
| Number of medical home visits                    | .2±.8                          | .2±.9           | .2±.9        | .2±.8        | .6           | .7     | .1     |
| Number of mental health visits                   | 1.3±3.7                        | 1.3±3.5         | 1.3±3.7      | 1.3±3.8      | .1           | .1     | .2     |
| Number of Emergency Department visits            | 1.9±3.7                        | 1.9±4.0         | 1.9±3.7      | 1.8±3.4      | .2           | .6     | .4     |
| Total hospital days                              | 5.1±12.1                       | 5.1±11.9        | 5.2±12.6     | 5.1±12.0     | .4           | .1     | .3     |
| Total depression/schizophrenia hospital days     | 2.2±7.5                        | 2.2±7.5         | 2.1±7.9      | 2.2±7.2      | .5           | .1     | .6     |
| Total Admissions                                 | .8±1.3                         | .8±.3           | .8±1.4       | .8±1.3       | .2           | .4     | .1     |
| Total depression/schizophrenia admissions        | .3±.8                          | .3±.8           | .3±.8        | .3±.8        | .1           | .4     | .4     |
| Not living in community independently            | 6.2                            | 6.3             | 6            | 6.4          | 1            | .4     | 1.4    |

† = All utilization covariates except current length of stay are utilization during previous 6 months. N=total discharges. Mean (SD) are weighted person-discharge characteristics within each cohort. Absolute standardized differences are expressed as percentages

Supplemental Data Table H. Weighted person discharge characteristics among adults discharged with schizophrenia diagnosis in a medical home by follow-up timing

|                                                  | Schizophrenia Medical Home |                               |                          |                           |       |        |        |
|--------------------------------------------------|----------------------------|-------------------------------|--------------------------|---------------------------|-------|--------|--------|
|                                                  | Overall<br>(N= 3,572)      | None in 30 days<br>(Wt.N=851) | 0-7 days<br>(Wt.N=1,357) | 8-30 days<br>(Wt.N=1,356) | Pair1 | Pair 2 | Pair 3 |
| Age (years)                                      | 40.3±12.7                  | 40.1±12.6                     | 40.4±14.2                | 40.4±12.7                 | 1.7   | 2.1    | .5     |
| Male                                             | 45.3                       | 46.3                          | 44.8                     | 44.7                      | 2.3   | 3.2    | .9     |
| White                                            | 36.3                       | 35.4                          | 36.7                     | 36.5                      | 2.3   | 2.3    | 0      |
| Black                                            | 58                         | 57.3                          | 57.8                     | 58.1                      | 1.9   | 1.5    | .4     |
| Asian                                            | 0.6                        | 0.5                           | 0.6                      | 0.7                       | .8    | 2      | 1.2    |
| American Indian                                  | 2.3                        | 3.2                           | 2.2                      | 2.1                       | 7.3   | 6.7    | .6     |
| Hispanic                                         | 1.5                        | 1.3                           | 1.6                      | 1.6                       | 2.2   | 2.4    | .3     |
| Hospital length of stay (current) †              | 11.8±26.2                  | 12.2±26.8                     | 10.5±23.2                | 11.6±23.9                 | 1.4   | 2.6    | 1.1    |
| Number of state hospital Admits                  | .2±.4                      | .2±.4                         | .1±.3                    | .1±0.4                    | 3.7   | 4.3    | .6     |
| Number of months in medical home                 | 5.1±1.7                    | 5.1±1.7                       | 5.1±1.9                  | 5.1±1.7                   | 3.7   | 3.6    | .2     |
| Chronic Illness & Disability Payment Score       | 4.4±2.7                    | 4.4±2.5                       | 4.6±3.0                  | 4.4±2.7                   | .6    | .3     | .9     |
| Number of months enrolled in Medicaid            | 5.9±.5                     | 5.9±.5                        | 5.9±.5                   | 5.9±.5                    | 1.4   | .7     | .8     |
| Enrolled in Behavioral Health Managed Care Pilot | 5                          | 5.2                           | 5.1                      | 5                         | 1.1   | 1      | .1     |
| Number of specified medical conditions           | 2.6±2.1                    | 2.6±2.1                       | 2.6±2.3                  | 2.6±2.0                   | .7    | .5     | .3     |
| Number of specified psychiatric conditions       | 1.6±.6                     | 1.6±.6                        | 1.6±.7                   | 1.6±.6                    | .1    | .4     | .4     |
| Specified Medical Conditions with medication     | .9±1.2                     | .9±1.2                        | 1.1±1.4                  | 1.0±1.2                   | .3    | 1.6    | 1.2    |
| Specified Psychiatric Conditions with medication | .9±.6                      | .9±.6                         | 1.0±.7                   | .9±.6                     | 2.4   | 5.2    | 2.7    |
| Number of individual psychotherapy sessions      | 1.3±3.3                    | 1.5±3.4                       | 1.3±4.0                  | 1.2±3.0                   | 4.8   | 9      | 3.5    |
| Number of family/group psychotherapy sessions    | .2±1.4                     | .2±1.7                        | .1±1.1                   | .2±1.4                    | 5.9   | 4.9    | .8     |
| Number of months with ACT visit                  | .5±1.5                     | .4±1.4                        | .5±1.7                   | .5±1.6                    | 4.9   | 4.9    | 0      |
| Total number of outpatient visits                | 12.4±16.3                  | 12.5±16.8                     | 12.6±18.4                | 12.1±15.2                 | 1.6   | 2.4    | 4      |
| Number of medical home visits                    | 1.4±2.1                    | 1.4±2.3                       | 1.4±2.3                  | 1.4±2.0                   | 3.4   | 4.4    | 1      |
| Number of mental health visits                   | 3.5±5.5                    | 3.8±6.0                       | 3.5±6.0                  | 3.3±5.2                   | 5.9   | 8.2    | 2.2    |
| Number of Emergency Department visits            | 2.1±3.2                    | 2.1±2.9                       | 2.2±3.6                  | 2.1±3.4                   | .2    | 1.2    | 1.3    |
| Total hospital days                              | 7.7±15.3                   | 7.6±14.8                      | 11.0±23.9                | 7.8±15.1                  | .4    | 1.5    | 1      |
| Total depression/schizophrenia hospital days     | 6.1±14.1                   | 6.0±13.0                      | 9.5±23.2                 | 6.3±14.3                  | 0     | 2      | 1.9    |
| Total Admissions                                 | .8±1.1                     | .8±1.1                        | 1.0±1.4                  | .8±1.2                    | 2.3   | 3.2    | .9     |
| Total depression/schizophrenia admissions        | .6±1.0                     | .6±1.0                        | .8±1.2                   | .6±1.0                    | 1.4   | 3.1    | 1.7    |
| Not living in community independently            | 19.6                       | 19.4                          | 19.4                     | 19.9                      | .1    | 1.2    | 1.3    |

† = All utilization covariates except current length of stay are utilization during previous 6 months. N=total discharges. Mean (SD) are weighted person-discharge characteristics within each cohort. Absolute standardized differences are expressed as percentages

Supplemental Data Table I. Weighted person discharge characteristics among adults discharged with schizophrenia diagnosis in a medical home by follow-up timing

|                                                  | Schizophrenia No Medical Home |                                 |                          |                           |       |        |        |
|--------------------------------------------------|-------------------------------|---------------------------------|--------------------------|---------------------------|-------|--------|--------|
|                                                  | Overall<br>(N=3494)           | None in 30 days<br>(Wt.N=1,128) | 0-7 days<br>(Wt.N=1,123) | 8-30 days<br>(Wt.N=1,225) | Pair1 | Pair 2 | Pair 3 |
| Age (years)                                      | 39.0±13.2                     | 38.9±13.2                       | 39.1±13.0                | 39.4±13.2                 | 1.2   | 5.5    | 4.2    |
| Male                                             | 50.1                          | 49.5                            | 49.9                     | 50                        | 2.2   | 1.2    | 1      |
| White                                            | 41.3                          | 40.9                            | 40.5                     | 41.7                      | .9    | 1.6    | .7     |
| Black                                            | 53.9                          | 54.1                            | 54.1                     | 53.8                      | 1.7   | 1.2    | .5     |
| Asian                                            | .5                            | 0.7                             | 1.1                      | 0.4                       | 1.3   | 1.9    | 3.2    |
| American Indian                                  | 2.1                           | 2                               | 2                        | 2                         | .3    | 1      | .7     |
| Hispanic                                         | 1.4                           | 1.6                             | 1.6                      | 1.3                       | .1    | .8     | .9     |
| Hospital length of stay (current) †              | 14.0±30.4                     | 37.7±275.0                      | 38.8±186.3               | 13.9±29.2                 | 2.8   | 2.1    | .7     |
| Number of state hospital Admits                  | .2±.4                         | .1±.3                           | .1±.3                    | .2±.4                     | 3.1   | 1.9    | 1.2    |
| Number of months in medical home                 | .4±1.2                        | .4±1.2                          | .4±1.2                   | .4±1.2                    | 1.1   | 2.3    | 1.2    |
| Chronic Illness & Disability Payment Score       | 3.8±2.9                       | 3.8±3.1                         | 3.8±2.9                  | 3.9±2.9                   | 3.8   | 5.3    | 1.6    |
| Number of months enrolled in Medicaid            | 5.0±1.9                       | 4.9±2.0                         | 4.9±2.0                  | 5.0±1.9                   | 1.9   | 3.5    | 1.6    |
| Enrolled in Behavioral Health Managed Care Pilot | 1.7                           | 1.6                             | 1.8                      | 1.7                       | 1.9   | 1.1    | .9     |
| Number of specified medical conditions           | 3.2±2.4                       | 3.2±2.4                         | 3.2±2.3                  | 3.2±2.3                   | .6    | 2.6    | 2.1    |
| Number of specified psychiatric conditions       | 1.6±.7                        | 1.5±.7                          | 1.5±.7                   | 1.6±.7                    | 1.6   | .1     | 1.7    |
| Specified Medical Conditions with medication     | .8±1.1                        | .8±1.2                          | .9±1.2                   | .8±1.2                    | 3     | 4.7    | 1.8    |
| Specified Psychiatric Conditions with medication | .8±.7)                        | .9±.6                           | .9±.6                    | .8±.7                     | 2.2   | 3.2    | 1.1    |
| Number of individual psychotherapy sessions      | 1.2±3.5                       | 1.1±3.4                         | 1.1±3.4                  | 1.2±3.7                   | 5.3   | 6      | .8     |
| Number of family/group psychotherapy sessions    | .1±.8                         | .0±.4                           | .1±1.0                   | .1±.9                     | 7.4   | 8      | .5     |
| Number of months with ACT visit                  | .4±1.3                        | .3±1.2                          | .4±1.3                   | .4±1.3                    | 2.2   | 1.6    | .6     |
| Total number of outpatient visits                | 8.6±12.9                      | 7.6±9.9                         | 8.6±13.4                 | 8.6±12.5                  | 8.8   | 4.5    | 4.5    |
| Number of medical home visits                    | .1±.4                         | .1±.4                           | .1±.4                    | .1±.5                     | .6    | .9     | .3     |
| Number of mental health visits                   | 2.8±4.9                       | 2.7±4.7                         | 2.7±4.8                  | 2.9±5.2                   | 4.1   | 4.2    | .2     |
| Number of Emergency Department visits            | 1.8±3.2                       | 1.7±2.9                         | 1.8±3.2                  | 1.8±3.2                   | 1.8   | .9     | .9     |
| Total hospital days                              | 9.8±21.0                      | 22.3±43.0                       | 22.2±43.0                | 9.9±20.5                  | .2    | .6     | .4     |
| Total depression/schizophrenia hospital days     | 7.9±19.8                      | 20.7±43.3                       | 20.5±42.8                | 8.0±19.8                  | 1.5   | .6     | 2.2    |
| Total Admissions                                 | .8±1.2                        | 1.1±1.3                         | 1.0±1.3                  | .8±1.2                    | .8    | 1.1    | 1.8    |
| Total depression/schizophrenia admissions        | .6±1.0                        | .9±1.1                          | .9±1.1                   | .6±1.0                    | 2.5   | 2.4    | 4.9    |
| Not living in community independently            | 28.3                          | 28.4                            | 27.9                     | 29                        | .8    | 2.9    | 2.1    |

† = All utilization covariates except current length of stay are utilization during previous 6 months. N=total discharges. Mean (SD) are weighted person-discharge characteristics within each cohort. Absolute standardized differences are expressed as percentages
